# Supplementary material for: New-Onset Atrial Fibrillation Is a Risk Factor of Ischemic Stroke in Chronic Obstructive Pulmonary Disease
Source: MDPI journal article supplement (doi:10.3390/healthcare10020381), 2022-02-17
Supplement: s1 [file s1]

**Table S1.** Factors of death in chronic obstructive pulmonary disease with multivariate logistic regression.

| Factors                           | Adjusted odds ratio (95% confidence interval) | <i>p</i> |
|-----------------------------------|-----------------------------------------------|----------|
| Age                               | 1.048 (1.043-1.052)                           | <0.001*  |
| Sex (Female)                      | 1.221 (1.115-1.337)                           | 0.002*   |
| Charlson Comorbidity index        | 1.097 (1.181-1.113)                           | <0.001*  |
| Frequent exacerbation             | 3.541 (3.248-3.86)                            | <0.001*  |
| New-onset atrial fibrillation     | 0.702 (0.606-0.812)                           | <0.001*  |
| Hypertension                      | 0.363 (0.324-0.407)                           | <0.001*  |
| Diabetes mellitus                 | 0.685 (0.612-0.718)                           | <0.001*  |
| Hyperlipidemia                    | 0.178 (0.074-0.43)                            | <0.001*  |
| Coronary artery disease           | 0.519 (0.46-0.586)                            | <0.001*  |
| Anemia                            | 0.68 (0.545-0.847)                            | <0.001*  |
| Chronic kidney disease            |                                               |          |
| Chronic kidney disease free       | Reference                                     |          |
| Chronic kidney disease stages 2-4 | 2.105 (1.766-2.51)                            | <0.001*  |
| End-stage renal disease           | 1.885 (1.577-2.252)                           | <0.001*  |
| Sepsis                            | 1.499 (1.374-1.635)                           | <0.001*  |
| Hospital type                     |                                               |          |
| Medical center                    | Reference                                     |          |
| Regional hospital                 | 0.903 (0.813-1.002)                           | 0.055    |
| Local hospital                    | 1.126 (1.01-1.255)                            | 0.032*   |

\**P*<0.05
